# Supplementary material for: Intermolecular C–H⋯O and n → π* and short intramolecular σ → π* interactions in the molybdenum(0) tetracarbonyl complex of a very twisted 14-membered tetraazaannulene macrocyclic ligand: structural and computational studies
Source: Royal Society of Chemistry journal article supplement (doi:10.1039/c9ce01005j), 2019-01-01
Supplement: c9ce01005j1.pdf [file c9ce01005j1.pdf]

**Supporting Information**

**Intermolecular C—H...O and n→π\* and Short Intramolecular σ→π\* Interactions in Molybdenum(0) Tetracarbonyl Complex of a very Twisted 14-membered Tetraazaannulene Macrocyclic Ligand: Structural and Computational Studies**

Reza Kia,\* Mahsa Hosseini, Amin Abdolrahimi, Melika Mahmoudi

*Chemistry Department, Sharif University of Technology, P.O. Box 11155-3516, Tehran, Iran*

\* Tel.: +98-21-66165332, E-mail: [rkia@sharif.edu](mailto:rkia@sharif.edu), [zsrkk@yahoo.com](mailto:zsrkk@yahoo.com)

| Contents:                                                                                                                                                           | Page  |
|---------------------------------------------------------------------------------------------------------------------------------------------------------------------|-------|
| <b>Experimental</b> (detailed synthetic method and spectra assignments).                                                                                            | 2     |
| <b>Computational details</b>                                                                                                                                        | 3     |
| <b>Figure S1.</b> FT-IR (ATR) spectrum of <b>1</b> .                                                                                                                | 4     |
| <b>Figure S2.</b> <sup>1</sup> H NMR (500 MHz), spectrum of <b>1</b> in CDCl <sub>3</sub> at room temperature.                                                      | 5     |
| <b>Figure S3.</b> <sup>13</sup> C{ <sup>1</sup> H} NMR (125 MHz), spectrum of <b>1</b> in CDCl <sub>3</sub> at room temperature.                                    | 6     |
| <b>Figure S4.</b> Expanded ESI-MS spectrum of <b>1</b> in base peak position.                                                                                       | 7     |
| <b>Fig. S5.</b> The isosurface of the intramolecular C–H···CO and C–H···π interactions with pale-blue green colour with arrows.                                     | 7     |
| <b>Table S1.</b> Crystal data, refinement parameters, bond lengths and angles for <b>1</b>                                                                          | 8-18  |
| <b>Table S2.</b> Comparison of important bond lengths of X-ray structure and geometry optimization                                                                  | 18    |
| <b>Table S3.</b> Optimized coordinates of <b>1</b> .                                                                                                                | 18-20 |
| <b>Table S4.</b> G03/B3LYP calculated one-electron energy and percentage composition of selected frontier MOs of <b>1</b> expressed in terms of component fragments | 21    |

## Synthesis and crystallization of **1**

An equimolar quantity of molybdenum hexacarbonyl (0.132 g, 0.5 mmol) and Me<sub>2</sub>Ph<sub>2</sub>H<sub>2</sub>TAA (0.234 g, 0.5 mmol) were mixed and refluxed in a mixture of toluene (40 mL) and THF (10 mL) for 12 h. The pale-orange product was obtained by adding n-hexane to the concentrated. Single-crystals suitable for X-ray analysis were grown by vapour diffusion of *n*-hexane into dichloromethane solution of **1**. Different part of the single-crystal batch was selected, grinded and heated in vacuum oven for CHNO analysis. Elemental analyses: *Calc.* (%): C, 62.30; H, 3.85; N, 7.65; O, 13.10 *Found:* C, 62.31; H, 3.82; N, 7.68; O, 13.11. <sup>1</sup>H-NMR (CDCl<sub>3</sub>, σ<sub>ppm</sub>): 2.24 and 2.26 (singlet, CH<sub>3</sub>, methyl protons), 4.21-4.38 (dd, methylene protons, CH<sub>2</sub>, *J* = 10 Hz), 4.95 (singlet, olefinic proton, CH); 12.90 (singlet, NH). <sup>13</sup>C{<sup>1</sup>H}-NMR (CDCl<sub>3</sub>, σ<sub>ppm</sub>): 21.1, 23.8, 54.5, 101.1, 122.3, 122.5, 123.5, 124.5, 124.9, 125.2, 125.3, 125.9, 127.6, 127.8, 128.2, 128.5, 128.8, 129.0, 29.8, 130.2, 134.1, 135.6, 137.4, 144.9, 145.6, 157.3, 162.4, 175.2, 202.7, 209.7, 223.1. ATR, FT-IR (ν, cm<sup>-1</sup>): 2003, 1976, 1860 and 1821 (four terminal CO); 1613 (imine, C=N). ESI-MS (positive mode) a base peak at *m/z* 469.2471 (**Fig. S3**) assignable to the mono-protonated macrocyclic ligand [Me<sub>2</sub>Ph<sub>2</sub>H<sub>3</sub>TAA]<sup>+</sup> resulted by de-coordination of Mo(CO)<sub>4</sub>.

## Computational details

Density functional theory (DFT) calculations have been performed using the *Gaussian 09* package to perform geometry optimizations, the vibrational frequencies and the electronic structures of the complex (M. Frisch, *et al.*, GAUSSIAN09. 2009. Gaussian Inc., Wallingford, CT, USA. <http://www.gaussian.com>). A frequency calculation after each geometry optimization ensured that the calculated structures are real minima in the potential energy surface of the molecules. The structure was optimized using the B3LYP exchange-correlation functionals with the LANL2DZ effective core pseudo-potential (ECP) and corresponding set of basic functions for Mo and 6-31G\* (five pure d functions) for C, H, N and O (D. Andrae, U. Häußermann, M. Dolg, H. Stoll & H. Preuß, *Theor. Chim. Acta*, 1990, 77, 123–141.). The NBO program (K. L. Schuchardt, B. T. Didier, T. Elsethagen, L. Sun, V. Gurumoorthi, J. Chase, J. Li, & T. L. Windus, *J. Chem. Info. & Model.*, 2007, 47, 1045–1052.) embedded in Gaussian 09 package used for calculations was done at B3LYP/LANL2DZ level of theory on optimized molecule. The natural bond orbital analysis emphasizes the role of intra- and intermolecular interaction or charge transfer in the title compound. It is performed by including all possible interaction between filled donor and empty acceptor NBOs and estimating the energetic importance by second-order perturbation theory. Molecular orbital (MO) compositions and the overlap populations were calculated using the AOMix 6.88 program (S. I. Gorelsky & A. B. P. Lever, *J. Organomet. Chem.*, 2001, 635, 187–196). The analysis of the molecular orbital (MO) compositions in terms of the highest occupied orbitals (HOMO) and lowest unoccupied orbitals (LUMOs) of the fragment species F1 and F2 (F1 is Mo(CO)<sub>4</sub> and F2 is Me<sub>2</sub>Ph<sub>2</sub>H<sub>2</sub>TAA) were performed by the AOMix 6.88 program. Charge decomposition analysis (CDA) implemented in AOMix 6.88 program was used to provide better qualitative and quantitative understanding of the nature of the chemical bonding in the complex based on the electron donation and back-donation between the metal and other fragments.

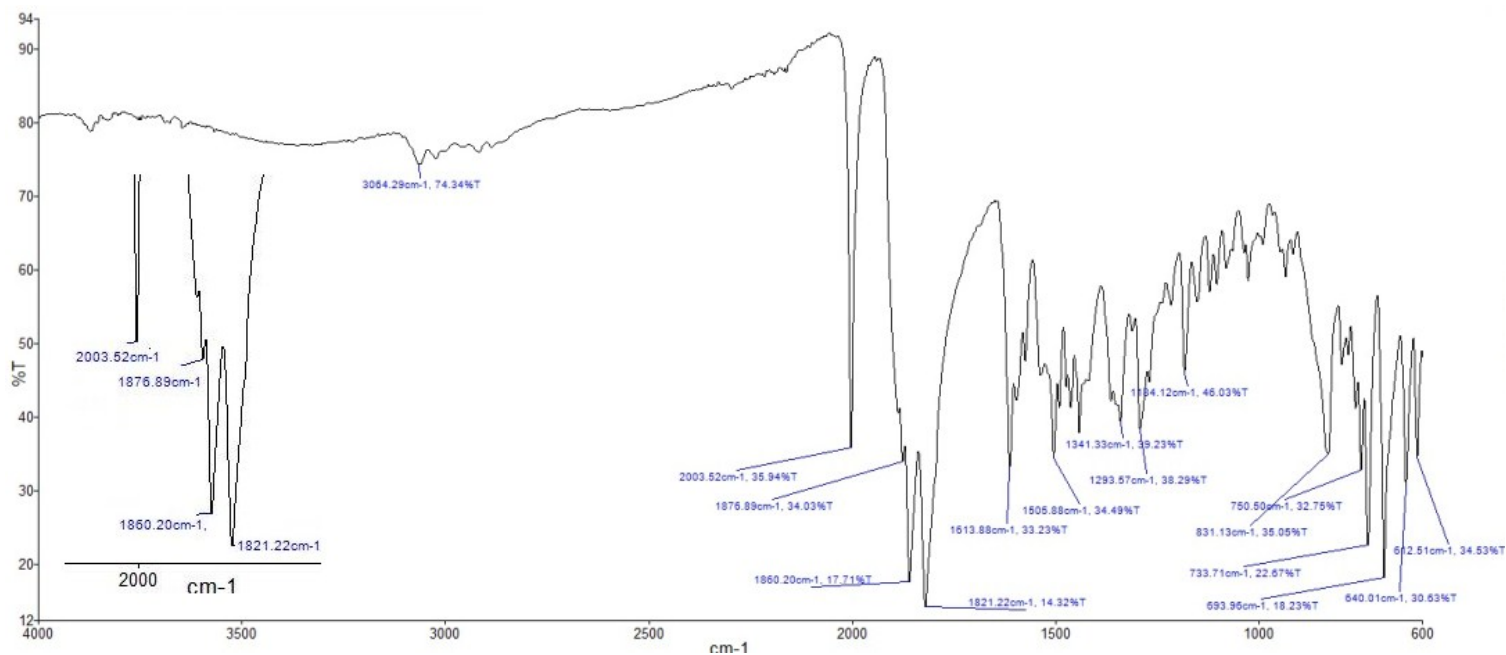

**Fig. S1.** The FT-IR (ATR) spectrum of **1**. The inset (left) shows the stretching region for Mo(CO)<sub>4</sub> segment.

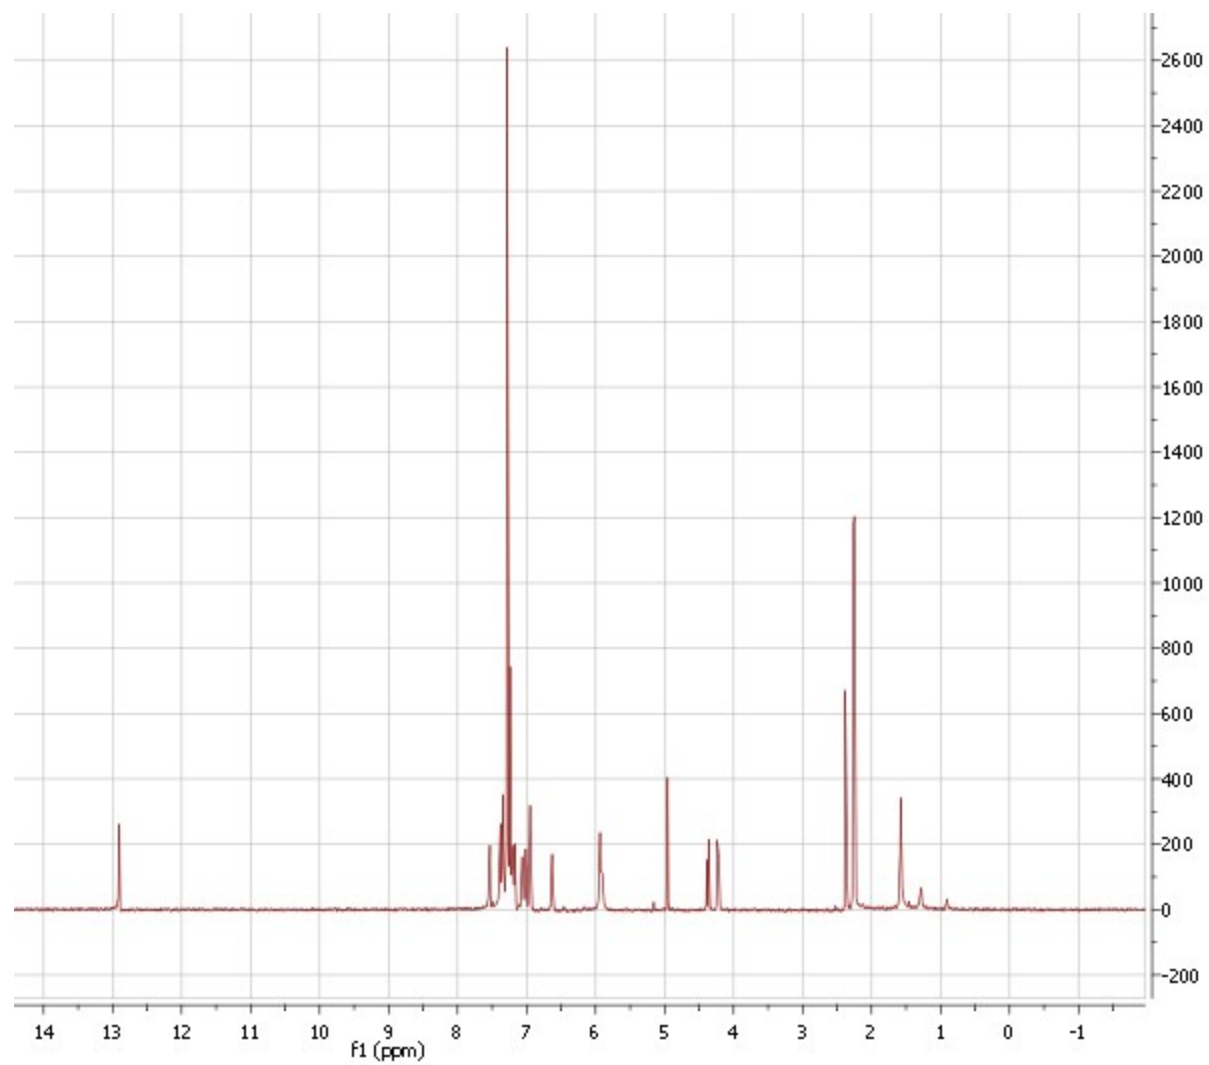

**Figure S2.** <sup>1</sup>H NMR (500 MHz), spectrum of the title compound in CDCl<sub>3</sub> at room temperature.

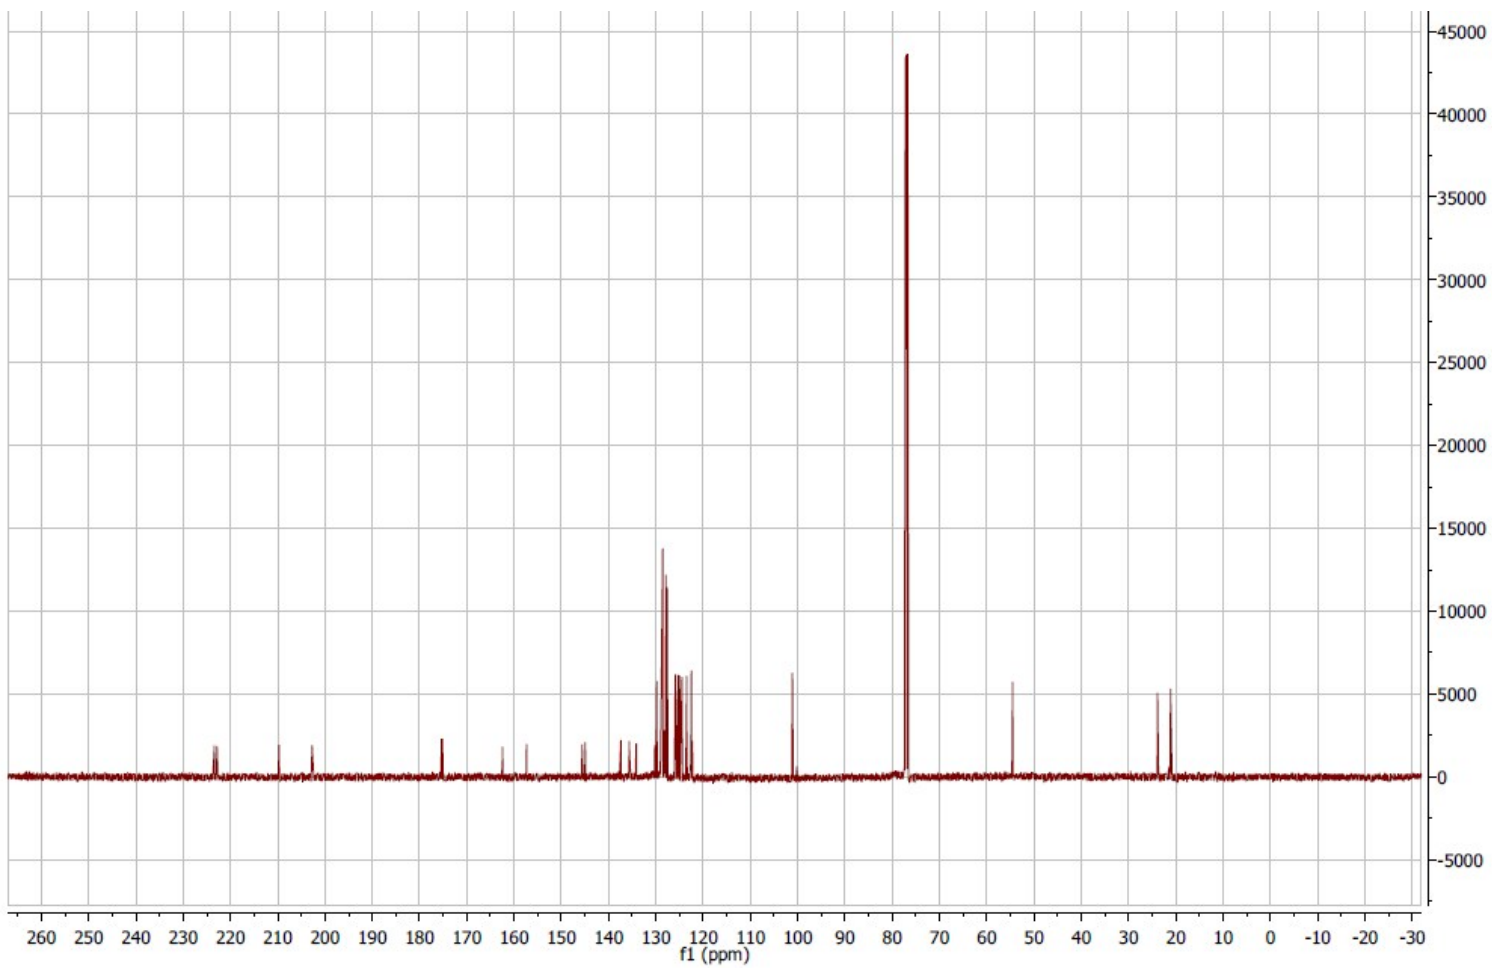

**Figure S3.**  $^{13}\text{C}\{^1\text{H}\}$  NMR (150 MHz), spectrum of **1** in  $\text{CDCl}_3$  at room temperature.

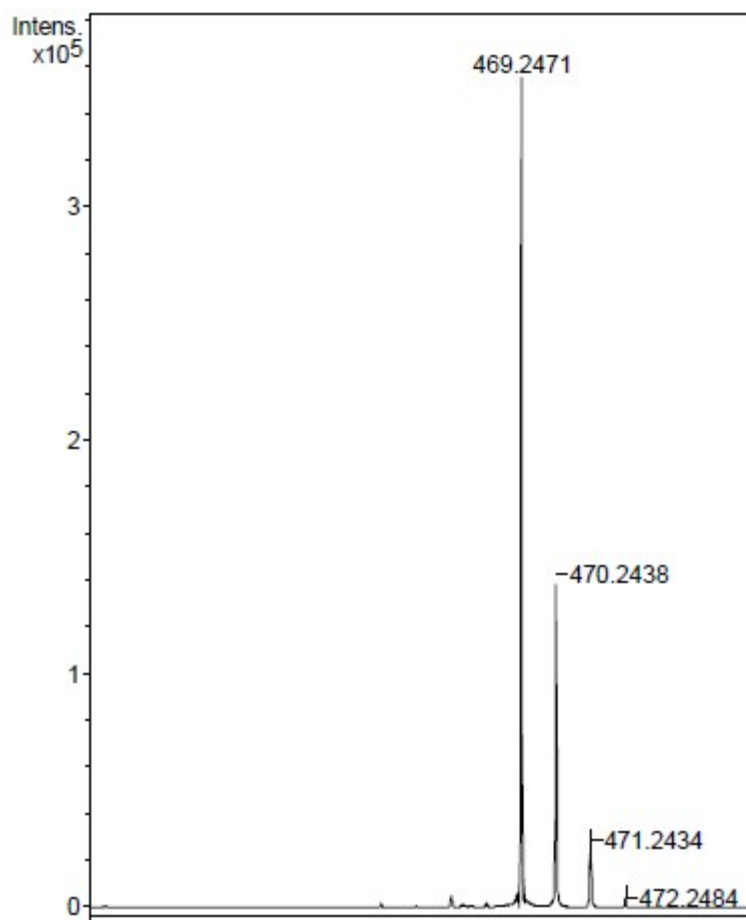

**Fig. S4.** Expanded ESI-MS spectrum of **1** in base peak position.

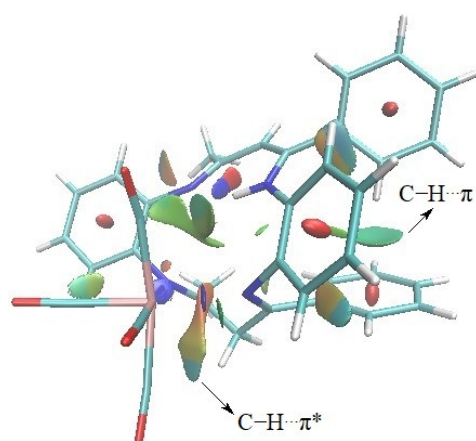

**Fig. S5.** The isosurface of the intramolecular C-H...CO and C-H...π interactions with pale-blue green colour with arrows.

Table S1. Crystal data and structure refinement for **1**.

|                                   |                                                                                                    |                 |
|-----------------------------------|----------------------------------------------------------------------------------------------------|-----------------|
| Identification code               | 1                                                                                                  |                 |
| Empirical formula                 | C <sub>36</sub> H <sub>28</sub> Mo N <sub>4</sub> O <sub>4</sub> · CH <sub>2</sub> Cl <sub>2</sub> |                 |
| Formula weight                    | 761.49                                                                                             |                 |
| Temperature                       | 150(2) K                                                                                           |                 |
| Wavelength                        | 0.71073 Å                                                                                          |                 |
| Crystal system                    | Monoclinic                                                                                         |                 |
| Space group                       | <i>P</i> 2 <sub>1</sub> / <i>n</i>                                                                 |                 |
| Unit cell dimensions              | a = 18.659(7) Å                                                                                    | α = 90°         |
|                                   | b = 9.1804(8) Å                                                                                    | β = 99.310(18)° |
|                                   | c = 20.117(3) Å                                                                                    | γ = 90°         |
| Volume                            | 3400.6(14) Å <sup>3</sup>                                                                          |                 |
| Z                                 | 4                                                                                                  |                 |
| Density (calculated)              | 1.487 Mg/m <sup>3</sup>                                                                            |                 |
| Absorption coefficient            | 0.589 mm <sup>-1</sup>                                                                             |                 |
| F(000)                            | 1552                                                                                               |                 |
| Crystal size                      | 0.300 x 0.100 x 0.050 mm <sup>3</sup>                                                              |                 |
| Theta range for data collection   | 3.022 to 29.607°                                                                                   |                 |
| Index ranges                      | -23 ≤ h ≤ 23, -12 ≤ k ≤ 12, -27 ≤ l ≤ 26                                                           |                 |
| Reflections collected             | 29588                                                                                              |                 |
| Independent reflections           | 8341 [R(int) = 0.0680]                                                                             |                 |
| Completeness to theta = 25.242°   | 99.8 %                                                                                             |                 |
| Absorption correction             | Semi-empirical from equivalents                                                                    |                 |
| Max. and min. transmission        | 1.00000 and 0.77769                                                                                |                 |
| Refinement method                 | Full-matrix least-squares on F <sup>2</sup>                                                        |                 |
| Data / restraints / parameters    | 8341 / 1 / 438                                                                                     |                 |
| Goodness-of-fit on F <sup>2</sup> | 1.060                                                                                              |                 |
| Final R indices [I > 2σ(I)]       | R1 = 0.0713, wR2 = 0.1607                                                                          |                 |
| R indices (all data)              | R1 = 0.0977, wR2 = 0.1777                                                                          |                 |
| Largest diff. peak and hole       | 1.814 and -1.604 e. Å <sup>-3</sup>                                                                |                 |



Table S1. Bond lengths [ $\text{\AA}$ ] and angles [ $^\circ$ ] for **1**.

---

|             |          |
|-------------|----------|
| C(1)-O(1)   | 1.143(7) |
| C(1)-Mo(1)  | 2.033(5) |
| C(2)-O(2)   | 1.141(6) |
| C(2)-Mo(1)  | 2.040(5) |
| C(3)-O(3)   | 1.156(6) |
| C(3)-Mo(1)  | 1.962(5) |
| C(4)-O(4)   | 1.178(6) |
| C(4)-Mo(1)  | 1.949(5) |
| C(5)-C(6)   | 1.395(7) |
| C(5)-C(10)  | 1.396(7) |
| C(5)-N(1)   | 1.442(6) |
| C(6)-C(7)   | 1.390(7) |
| C(6)-H(6)   | 0.9300   |
| C(7)-C(8)   | 1.387(9) |
| C(7)-H(7)   | 0.9300   |
| C(8)-C(9)   | 1.371(8) |
| C(8)-H(8)   | 0.9300   |
| C(9)-C(10)  | 1.403(7) |
| C(9)-H(9)   | 0.9300   |
| C(10)-N(3)  | 1.409(6) |
| C(11)-N(3)  | 1.302(7) |
| C(11)-C(12) | 1.434(7) |
| C(11)-C(23) | 1.520(8) |
| C(12)-C(13) | 1.368(7) |
| C(12)-H(12) | 0.9300   |
| C(13)-N(4)  | 1.354(6) |
| C(13)-C(24) | 1.498(7) |
| C(14)-C(19) | 1.383(6) |
| C(14)-C(15) | 1.407(6) |
| C(14)-N(4)  | 1.410(6) |
| C(15)-C(16) | 1.379(7) |
| C(15)-H(15) | 0.9300   |
| C(16)-C(17) | 1.380(8) |
| C(16)-H(16) | 0.9300   |

|              |          |
|--------------|----------|
| C(17)-C(18)  | 1.380(7) |
| C(17)-H(17)  | 0.9300   |
| C(18)-C(19)  | 1.392(6) |
| C(18)-H(18)  | 0.9300   |
| C(19)-N(2)   | 1.447(5) |
| C(20)-N(2)   | 1.292(6) |
| C(20)-C(30)  | 1.490(6) |
| C(20)-C(21)  | 1.513(6) |
| C(21)-C(22)  | 1.513(6) |
| C(21)-H(21A) | 0.9700   |
| C(21)-H(21B) | 0.9700   |
| C(22)-N(1)   | 1.294(6) |
| C(22)-C(36)  | 1.490(7) |
| C(23)-H(23A) | 0.9600   |
| C(23)-H(23B) | 0.9600   |
| C(23)-H(23C) | 0.9600   |
| C(24)-C(25)  | 1.365(8) |
| C(24)-C(29)  | 1.376(7) |
| C(25)-C(26)  | 1.396(8) |
| C(25)-H(25)  | 0.9300   |
| C(26)-C(27)  | 1.373(9) |
| C(26)-H(26)  | 0.9300   |
| C(27)-C(28)  | 1.367(9) |
| C(27)-H(27)  | 0.9300   |
| C(28)-C(29)  | 1.382(8) |
| C(28)-H(28)  | 0.9300   |
| C(29)-H(29)  | 0.9300   |
| C(30)-C(35)  | 1.388(7) |
| C(30)-C(31)  | 1.406(6) |
| C(31)-C(32)  | 1.390(7) |
| C(31)-H(31)  | 0.9300   |
| C(32)-C(33)  | 1.389(8) |
| C(32)-H(32)  | 0.9300   |
| C(33)-C(34)  | 1.391(7) |
| C(33)-H(33)  | 0.9300   |
| C(34)-C(35)  | 1.383(7) |

|                  |           |
|------------------|-----------|
| C(34)-H(34)      | 0.9300    |
| C(35)-H(35)      | 0.9300    |
| C(36)-H(36A)     | 0.9600    |
| C(36)-H(36B)     | 0.9600    |
| C(36)-H(36C)     | 0.9600    |
| N(1)-Mo(1)       | 2.266(4)  |
| N(2)-Mo(1)       | 2.258(4)  |
| N(4)-H(1N4)      | 0.850(10) |
| Cl(1)-C(1S)      | 1.820(15) |
| Cl(2)-C(1S)      | 1.827(11) |
| C(1S)-H(1S1)     | 0.9700    |
| C(1S)-H(1S2)     | 0.9700    |
| O(1)-C(1)-Mo(1)  | 167.7(5)  |
| O(2)-C(2)-Mo(1)  | 170.2(5)  |
| O(3)-C(3)-Mo(1)  | 178.0(5)  |
| O(4)-C(4)-Mo(1)  | 177.1(4)  |
| C(6)-C(5)-C(10)  | 121.7(4)  |
| C(6)-C(5)-N(1)   | 119.7(5)  |
| C(10)-C(5)-N(1)  | 118.6(4)  |
| C(7)-C(6)-C(5)   | 118.8(5)  |
| C(7)-C(6)-H(6)   | 120.6     |
| C(5)-C(6)-H(6)   | 120.6     |
| C(8)-C(7)-C(6)   | 120.7(5)  |
| C(8)-C(7)-H(7)   | 119.7     |
| C(6)-C(7)-H(7)   | 119.7     |
| C(9)-C(8)-C(7)   | 119.7(5)  |
| C(9)-C(8)-H(8)   | 120.2     |
| C(7)-C(8)-H(8)   | 120.2     |
| C(8)-C(9)-C(10)  | 121.7(6)  |
| C(8)-C(9)-H(9)   | 119.1     |
| C(10)-C(9)-H(9)  | 119.1     |
| C(5)-C(10)-C(9)  | 117.4(5)  |
| C(5)-C(10)-N(3)  | 117.8(4)  |
| C(9)-C(10)-N(3)  | 124.4(5)  |
| N(3)-C(11)-C(12) | 119.7(5)  |

|                     |          |
|---------------------|----------|
| N(3)-C(11)-C(23)    | 125.5(5) |
| C(12)-C(11)-C(23)   | 114.7(5) |
| C(13)-C(12)-C(11)   | 126.1(5) |
| C(13)-C(12)-H(12)   | 116.9    |
| C(11)-C(12)-H(12)   | 116.9    |
| N(4)-C(13)-C(12)    | 121.8(4) |
| N(4)-C(13)-C(24)    | 120.8(4) |
| C(12)-C(13)-C(24)   | 117.2(5) |
| C(19)-C(14)-C(15)   | 118.2(4) |
| C(19)-C(14)-N(4)    | 119.0(4) |
| C(15)-C(14)-N(4)    | 122.8(4) |
| C(16)-C(15)-C(14)   | 120.2(5) |
| C(16)-C(15)-H(15)   | 119.9    |
| C(14)-C(15)-H(15)   | 119.9    |
| C(17)-C(16)-C(15)   | 121.0(5) |
| C(17)-C(16)-H(16)   | 119.5    |
| C(15)-C(16)-H(16)   | 119.5    |
| C(16)-C(17)-C(18)   | 119.4(5) |
| C(16)-C(17)-H(17)   | 120.3    |
| C(18)-C(17)-H(17)   | 120.3    |
| C(17)-C(18)-C(19)   | 120.0(5) |
| C(17)-C(18)-H(18)   | 120.0    |
| C(19)-C(18)-H(18)   | 120.0    |
| C(14)-C(19)-C(18)   | 121.1(4) |
| C(14)-C(19)-N(2)    | 120.4(4) |
| C(18)-C(19)-N(2)    | 118.4(4) |
| N(2)-C(20)-C(30)    | 125.8(4) |
| N(2)-C(20)-C(21)    | 117.4(4) |
| C(30)-C(20)-C(21)   | 116.8(4) |
| C(20)-C(21)-C(22)   | 111.7(4) |
| C(20)-C(21)-H(21A)  | 109.3    |
| C(22)-C(21)-H(21A)  | 109.3    |
| C(20)-C(21)-H(21B)  | 109.3    |
| C(22)-C(21)-H(21B)  | 109.3    |
| H(21A)-C(21)-H(21B) | 107.9    |
| N(1)-C(22)-C(36)    | 126.1(4) |

|                     |          |
|---------------------|----------|
| N(1)-C(22)-C(21)    | 116.6(4) |
| C(36)-C(22)-C(21)   | 117.3(4) |
| C(11)-C(23)-H(23A)  | 109.5    |
| C(11)-C(23)-H(23B)  | 109.5    |
| H(23A)-C(23)-H(23B) | 109.5    |
| C(11)-C(23)-H(23C)  | 109.5    |
| H(23A)-C(23)-H(23C) | 109.5    |
| H(23B)-C(23)-H(23C) | 109.5    |
| C(25)-C(24)-C(29)   | 119.1(5) |
| C(25)-C(24)-C(13)   | 120.2(5) |
| C(29)-C(24)-C(13)   | 120.7(5) |
| C(24)-C(25)-C(26)   | 120.3(6) |
| C(24)-C(25)-H(25)   | 119.8    |
| C(26)-C(25)-H(25)   | 119.8    |
| C(27)-C(26)-C(25)   | 120.0(6) |
| C(27)-C(26)-H(26)   | 120.0    |
| C(25)-C(26)-H(26)   | 120.0    |
| C(28)-C(27)-C(26)   | 119.6(5) |
| C(28)-C(27)-H(27)   | 120.2    |
| C(26)-C(27)-H(27)   | 120.2    |
| C(27)-C(28)-C(29)   | 120.2(6) |
| C(27)-C(28)-H(28)   | 119.9    |
| C(29)-C(28)-H(28)   | 119.9    |
| C(24)-C(29)-C(28)   | 120.7(5) |
| C(24)-C(29)-H(29)   | 119.7    |
| C(28)-C(29)-H(29)   | 119.7    |
| C(35)-C(30)-C(31)   | 118.9(4) |
| C(35)-C(30)-C(20)   | 118.7(4) |
| C(31)-C(30)-C(20)   | 122.4(4) |
| C(32)-C(31)-C(30)   | 119.5(5) |
| C(32)-C(31)-H(31)   | 120.3    |
| C(30)-C(31)-H(31)   | 120.3    |
| C(31)-C(32)-C(33)   | 120.8(4) |
| C(31)-C(32)-H(32)   | 119.6    |
| C(33)-C(32)-H(32)   | 119.6    |
| C(32)-C(33)-C(34)   | 119.8(5) |

|                     |            |
|---------------------|------------|
| C(32)-C(33)-H(33)   | 120.1      |
| C(34)-C(33)-H(33)   | 120.1      |
| C(35)-C(34)-C(33)   | 119.5(5)   |
| C(35)-C(34)-H(34)   | 120.3      |
| C(33)-C(34)-H(34)   | 120.3      |
| C(34)-C(35)-C(30)   | 121.5(4)   |
| C(34)-C(35)-H(35)   | 119.2      |
| C(30)-C(35)-H(35)   | 119.2      |
| C(22)-C(36)-H(36A)  | 109.5      |
| C(22)-C(36)-H(36B)  | 109.5      |
| H(36A)-C(36)-H(36B) | 109.5      |
| C(22)-C(36)-H(36C)  | 109.5      |
| H(36A)-C(36)-H(36C) | 109.5      |
| H(36B)-C(36)-H(36C) | 109.5      |
| C(22)-N(1)-C(5)     | 117.8(4)   |
| C(22)-N(1)-Mo(1)    | 124.9(3)   |
| C(5)-N(1)-Mo(1)     | 117.3(3)   |
| C(20)-N(2)-C(19)    | 118.2(4)   |
| C(20)-N(2)-Mo(1)    | 124.4(3)   |
| C(19)-N(2)-Mo(1)    | 116.9(3)   |
| C(11)-N(3)-C(10)    | 122.6(4)   |
| C(13)-N(4)-C(14)    | 129.0(4)   |
| C(13)-N(4)-H(1N4)   | 111(10)    |
| C(14)-N(4)-H(1N4)   | 120(10)    |
| C(4)-Mo(1)-C(3)     | 88.6(2)    |
| C(4)-Mo(1)-C(1)     | 83.4(2)    |
| C(3)-Mo(1)-C(1)     | 84.0(2)    |
| C(4)-Mo(1)-C(2)     | 84.1(2)    |
| C(3)-Mo(1)-C(2)     | 86.61(19)  |
| C(1)-Mo(1)-C(2)     | 164.6(2)   |
| C(4)-Mo(1)-N(2)     | 98.09(17)  |
| C(3)-Mo(1)-N(2)     | 172.79(18) |
| C(1)-Mo(1)-N(2)     | 94.04(18)  |
| C(2)-Mo(1)-N(2)     | 96.72(16)  |
| C(4)-Mo(1)-N(1)     | 176.89(16) |
| C(3)-Mo(1)-N(1)     | 94.52(18)  |

|                     |           |
|---------------------|-----------|
| C(1)-Mo(1)-N(1)     | 96.8(2)   |
| C(2)-Mo(1)-N(1)     | 96.14(17) |
| N(2)-Mo(1)-N(1)     | 78.79(13) |
| Cl(1)-C(1S)-Cl(2)   | 98.1(7)   |
| Cl(1)-C(1S)-H(1S1)  | 112.1     |
| Cl(2)-C(1S)-H(1S1)  | 112.1     |
| Cl(1)-C(1S)-H(1S2)  | 112.1     |
| Cl(2)-C(1S)-H(1S2)  | 112.1     |
| H(1S1)-C(1S)-H(1S2) | 109.8     |

---

Table S1. Torsion angles [°] for **1**.

---

|                         |           |
|-------------------------|-----------|
| C(10)-C(5)-C(6)-C(7)    | -0.3(9)   |
| N(1)-C(5)-C(6)-C(7)     | 179.1(5)  |
| C(5)-C(6)-C(7)-C(8)     | -1.8(9)   |
| C(6)-C(7)-C(8)-C(9)     | 1.1(10)   |
| C(7)-C(8)-C(9)-C(10)    | 1.8(10)   |
| C(6)-C(5)-C(10)-C(9)    | 2.9(9)    |
| N(1)-C(5)-C(10)-C(9)    | -176.4(5) |
| C(6)-C(5)-C(10)-N(3)    | 176.2(5)  |
| N(1)-C(5)-C(10)-N(3)    | -3.1(8)   |
| C(8)-C(9)-C(10)-C(5)    | -3.7(9)   |
| C(8)-C(9)-C(10)-N(3)    | -176.5(6) |
| N(3)-C(11)-C(12)-C(13)  | 8.9(10)   |
| C(23)-C(11)-C(12)-C(13) | -167.7(6) |
| C(11)-C(12)-C(13)-N(4)  | -0.2(10)  |
| C(11)-C(12)-C(13)-C(24) | 175.3(6)  |
| C(19)-C(14)-C(15)-C(16) | 3.1(7)    |
| N(4)-C(14)-C(15)-C(16)  | -177.8(5) |
| C(14)-C(15)-C(16)-C(17) | -3.8(8)   |
| C(15)-C(16)-C(17)-C(18) | 0.8(8)    |
| C(16)-C(17)-C(18)-C(19) | 2.7(8)    |
| C(15)-C(14)-C(19)-C(18) | 0.4(7)    |
| N(4)-C(14)-C(19)-C(18)  | -178.7(4) |
| C(15)-C(14)-C(19)-N(2)  | 179.6(4)  |
| N(4)-C(14)-C(19)-N(2)   | 0.5(7)    |
| C(17)-C(18)-C(19)-C(14) | -3.3(7)   |
| C(17)-C(18)-C(19)-N(2)  | 177.5(4)  |
| N(2)-C(20)-C(21)-C(22)  | 63.5(6)   |
| C(30)-C(20)-C(21)-C(22) | -114.5(5) |
| C(20)-C(21)-C(22)-N(1)  | -60.8(5)  |
| C(20)-C(21)-C(22)-C(36) | 118.8(5)  |
| N(4)-C(13)-C(24)-C(25)  | -120.8(6) |
| C(12)-C(13)-C(24)-C(25) | 63.6(8)   |
| N(4)-C(13)-C(24)-C(29)  | 60.7(8)   |
| C(12)-C(13)-C(24)-C(29) | -114.9(6) |



|                         |           |
|-------------------------|-----------|
| C(29)-C(24)-C(25)-C(26) | 1.9(11)   |
| C(13)-C(24)-C(25)-C(26) | -176.6(7) |
| C(24)-C(25)-C(26)-C(27) | 0.5(13)   |
| C(25)-C(26)-C(27)-C(28) | -1.5(13)  |
| C(26)-C(27)-C(28)-C(29) | 0.3(11)   |
| C(25)-C(24)-C(29)-C(28) | -3.2(10)  |
| C(13)-C(24)-C(29)-C(28) | 175.3(6)  |
| C(27)-C(28)-C(29)-C(24) | 2.1(10)   |
| N(2)-C(20)-C(30)-C(35)  | -130.6(5) |
| C(21)-C(20)-C(30)-C(35) | 47.3(6)   |
| N(2)-C(20)-C(30)-C(31)  | 51.2(7)   |
| C(21)-C(20)-C(30)-C(31) | -130.9(5) |
| C(35)-C(30)-C(31)-C(32) | 1.2(7)    |
| C(20)-C(30)-C(31)-C(32) | 179.4(5)  |
| C(30)-C(31)-C(32)-C(33) | -0.2(8)   |
| C(31)-C(32)-C(33)-C(34) | -0.7(8)   |
| C(32)-C(33)-C(34)-C(35) | 0.4(8)    |
| C(33)-C(34)-C(35)-C(30) | 0.7(8)    |
| C(31)-C(30)-C(35)-C(34) | -1.5(8)   |
| C(20)-C(30)-C(35)-C(34) | -179.8(5) |
| C(36)-C(22)-N(1)-C(5)   | -1.4(7)   |
| C(21)-C(22)-N(1)-C(5)   | 178.1(4)  |
| C(36)-C(22)-N(1)-Mo(1)  | -179.9(4) |
| C(21)-C(22)-N(1)-Mo(1)  | -0.4(6)   |
| C(6)-C(5)-N(1)-C(22)    | 97.9(6)   |
| C(10)-C(5)-N(1)-C(22)   | -82.8(6)  |
| C(6)-C(5)-N(1)-Mo(1)    | -83.5(5)  |
| C(10)-C(5)-N(1)-Mo(1)   | 95.9(5)   |
| C(30)-C(20)-N(2)-C(19)  | 1.7(7)    |
| C(21)-C(20)-N(2)-C(19)  | -176.2(4) |
| C(30)-C(20)-N(2)-Mo(1)  | 174.1(3)  |
| C(21)-C(20)-N(2)-Mo(1)  | -3.7(6)   |
| C(14)-C(19)-N(2)-C(20)  | 79.6(5)   |
| C(18)-C(19)-N(2)-C(20)  | -101.2(5) |
| C(14)-C(19)-N(2)-Mo(1)  | -93.4(4)  |
| C(18)-C(19)-N(2)-Mo(1)  | 85.8(4)   |

|                        |           |
|------------------------|-----------|
| C(12)-C(11)-N(3)-C(10) | 176.6(5)  |
| C(23)-C(11)-N(3)-C(10) | -7.2(9)   |
| C(5)-C(10)-N(3)-C(11)  | 136.9(6)  |
| C(9)-C(10)-N(3)-C(11)  | -50.4(9)  |
| C(12)-C(13)-N(4)-C(14) | 178.2(5)  |
| C(24)-C(13)-N(4)-C(14) | 2.9(8)    |
| C(19)-C(14)-N(4)-C(13) | -144.4(5) |
| C(15)-C(14)-N(4)-C(13) | 36.6(8)   |

---

**Table S2.** Comparison of important bond lengths of X-ray structure and geometry optimization

| Bond/Interaction     | Experimental (Å) | Theoretical (Å) |
|----------------------|------------------|-----------------|
| Mo1—N1               | 2.265(4)         | 2.335           |
| Mo1—N2               | 2.258(4)         | 2.341           |
| Mo1—C1               | 2.032(6)         | 2.066           |
| Mo1—C3               | 1.962(4)         | 1.990           |
| Mo1—C2               | 2.040(5)         | 2.056           |
| Mo1—C4               | 1.949(5)         | 1.989           |
| C21···C2             | 3.288(7)         | 3.281           |
| H21A···C2            | 2.54             | 2.376           |
| C29···C <sub>g</sub> | 3.524(6)         | 3.760           |
| H29···C <sub>g</sub> | 2.605            | 2.717           |

**Table S3.** Optimized Cartesian coordinates of **1**.

|   |            |             |             |
|---|------------|-------------|-------------|
| C | 1.84511500 | -0.04620300 | -1.97811200 |
| C | 3.16446600 | -2.48497400 | 1.05027100  |
| C | 4.26583400 | -0.79154500 | -0.82169400 |
| C | 2.39416700 | -2.75270000 | -1.58594700 |
| C | 2.64284800 | 1.85718200  | 0.67514000  |
| C | 4.01509500 | 2.09028800  | 0.77624900  |
| H | 4.64014200 | 1.33714400  | 1.24518600  |
| C | 4.57656400 | 3.25593200  | 0.25670600  |
| H | 5.64622800 | 3.42343500  | 0.33851400  |
| C | 3.75984300 | 4.17858700  | -0.39892700 |

|   |             |             |             |
|---|-------------|-------------|-------------|
| H | 4.19034800  | 5.07011500  | -0.84663000 |
| C | 2.38887100  | 3.95468000  | -0.49776200 |
| H | 1.77168200  | 4.65473300  | -1.04943600 |
| C | 1.78581100  | 2.81011700  | 0.06327800  |
| C | -0.55839300 | 3.35013900  | 0.00611700  |
| C | -1.90566600 | 2.91452300  | -0.26404900 |
| H | -2.68746500 | 3.65355300  | -0.13578800 |
| C | -2.32343700 | 1.64376400  | -0.62304300 |
| C | -1.56796400 | -0.67429200 | -1.25279100 |
| C | -2.38591200 | -0.93983800 | -2.36160000 |
| H | -2.95425000 | -0.13047300 | -2.80365400 |
| C | -2.45721000 | -2.21913900 | -2.90604800 |
| H | -3.09848200 | -2.39843100 | -3.76413200 |
| C | -1.68429100 | -3.25356800 | -2.37472800 |
| H | -1.71919500 | -4.24851800 | -2.80785800 |
| C | -0.83741100 | -2.99662800 | -1.29904400 |
| H | -0.19740900 | -3.77654900 | -0.89949400 |
| C | -0.78570500 | -1.72590500 | -0.72098400 |
| C | -0.25450900 | -1.24864400 | 1.54697600  |
| C | 0.78967200  | -0.79853900 | 2.56023200  |
| H | 1.58541000  | -1.55750700 | 2.56426700  |
| H | 0.35290700  | -0.75949100 | 3.55926500  |
| C | 1.41779700  | 0.53592700  | 2.20033200  |
| C | -0.42114200 | 4.81615900  | 0.39268400  |
| H | -1.29460000 | 5.12971400  | 0.97349800  |
| H | -0.37857000 | 5.45992200  | -0.49488800 |
| H | 0.48091400  | 5.00082700  | 0.98069900  |
| C | -3.78005000 | 1.41181400  | -0.83850300 |
| C | -4.51932600 | 2.29853200  | -1.63758800 |
| H | -4.00607600 | 3.11328800  | -2.13966000 |
| C | -5.89369000 | 2.12637300  | -1.80634400 |
| H | -6.44914800 | 2.81616300  | -2.43596300 |
| C | -6.55009800 | 1.06944000  | -1.17339500 |
| H | -7.62041100 | 0.93455000  | -1.30387700 |
| C | -5.82271300 | 0.18397100  | -0.37381500 |
| H | -6.32607500 | -0.63857800 | 0.12696500  |

|    |             |             |             |
|----|-------------|-------------|-------------|
| C  | -4.44866000 | 0.34833300  | -0.20987000 |
| H  | -3.89352900 | -0.34196200 | 0.41496300  |
| C  | -1.64393100 | -1.43376200 | 2.05493200  |
| C  | -2.37435000 | -2.60262800 | 1.77726600  |
| H  | -1.94272100 | -3.37080000 | 1.14697800  |
| C  | -3.64269100 | -2.79228300 | 2.32562700  |
| H  | -4.18581200 | -3.70833900 | 2.11116300  |
| C  | -4.20916300 | -1.81731600 | 3.14966200  |
| H  | -5.19774500 | -1.96775400 | 3.57441000  |
| C  | -3.49453800 | -0.65071100 | 3.43131600  |
| H  | -3.92750100 | 0.11577700  | 4.06776000  |
| C  | -2.21936600 | -0.46751500 | 2.89981200  |
| H  | -1.67524700 | 0.44436100  | 3.12670300  |
| C  | 1.16781800  | 1.68762200  | 3.13989500  |
| H  | 1.83601200  | 2.52667600  | 2.94013100  |
| H  | 1.29916000  | 1.36137900  | 4.17816600  |
| H  | 0.13439100  | 2.04336500  | 3.03645700  |
| N  | 2.11274400  | 0.60095300  | 1.11901300  |
| N  | 0.15259500  | -1.45989400 | 0.33524300  |
| N  | 0.43086900  | 2.49254600  | -0.05090000 |
| N  | -1.43345300 | 0.60953500  | -0.68481100 |
| O  | 1.64144500  | 0.53506400  | -2.95646200 |
| O  | 3.70013600  | -3.25593400 | 1.73331300  |
| O  | 5.37343000  | -0.54770200 | -1.08305700 |
| O  | 2.39128900  | -3.67260400 | -2.30038700 |
| Mo | 2.37635800  | -1.19751100 | -0.34633800 |
| H  | -0.48181100 | 0.91311000  | -0.42809100 |

**Table S4.** G03/B3LYP calculated one-electron energy and percentage composition of selected frontier MOs of **1** in terms of component fragments

| <b>MO</b>  | <b>Orbital</b> | <b>Energy (eV)</b> | <b>Mo(CO)<sub>4</sub></b> | <b>Me<sub>2</sub>Ph<sub>2</sub>H<sub>2</sub>TAA</b> |
|------------|----------------|--------------------|---------------------------|-----------------------------------------------------|
| 244        | LUMO + 3       | -0.60              | 3.3                       | 96.7                                                |
| 243        | LUMO + 2       | -0.83              | 10.3                      | 89.7                                                |
| 242        | LUMO + 1       | -1.57              | 1.2                       | 98.8                                                |
| <b>241</b> | <b>LUMO</b>    | <b>-1.87</b>       | <b>9.8</b>                | <b>90.2</b>                                         |
| <b>240</b> | <b>HOMO</b>    | <b>-5.01</b>       | <b>85.6</b>               | <b>14.4</b>                                         |
| 239        | HOMO – 1       | -5.30              | 93.4                      | 6.6                                                 |
| 238        | HOMO – 2       | -5.35              | 91.5                      | 8.5                                                 |
| 237        | HOMO – 3       | -5.58              | 7.2                       | 92.8                                                |
